# Supplementary material
Source: PubMed Central journal article supplement (PMC8976826)
Supplement: NIHMS1774023-supplement-1.pdf [file NIHMS1774023-supplement-1.pdf]

**Supplemental Table I.** List of antibodies used for immunophenotyping.

| <b>Anti-human antibodies</b> |                     |              |                |                                   |
|------------------------------|---------------------|--------------|----------------|-----------------------------------|
| <b>Cell marker</b>           | <b>Fluorochrome</b> | <b>Clone</b> | <b>Company</b> | <b>Isotype</b>                    |
| CD3 $\epsilon$               | BV650               | OKT3         | Biologend      | Mouse IgG2a, $\kappa$             |
| CD19                         | BUV737              | SJ25C1       | BD Biosciences | Mouse BALB/c IgG1, $\kappa$       |
| CD14                         | BUV395              | M $\phi$ P9  | BD Biosciences | Mouse BALB/c IgG2b, $\kappa$      |
| CD15                         | BV605               | W6D3         | BD Biosciences | Mouse IgG <sub>1</sub> , $\kappa$ |
| CD56                         | PE-Cy7              | B159         | BD Biosciences | Mouse IgG <sub>1</sub> , $\kappa$ |
| CD11b                        | PE-Cy5              | ICRF44       | BD Biosciences | Mouse IgG <sub>1</sub> , $\kappa$ |
| CD127                        | BV711               | HIL-7R-M21   | BD Biosciences | Mouse IgG <sub>1</sub> , $\kappa$ |
| CD69                         | Alexa Fluor 700     | FN50         | BD Biosciences | Mouse IgG <sub>1</sub> , $\kappa$ |
| ROR $\gamma$ T               | APC                 | 600380       | R&D Systems    | Mouse IgG2b                       |
| IL-13                        | FITC                | B-P6         | eBiosciences   | Mouse / IgG1                      |
| IL-5                         | BV421               | TRFK5        | Biologend      | Rat IgG1, $\kappa$                |
| IFN- $\gamma$                | APC-Cy7             | 4S.B3        | Biologend      | Mouse IgG <sub>1</sub> , $\kappa$ |
| IL-17A                       | BV786               | N49-653      | BD Biosciences | Mouse IgG <sub>1</sub> , $\kappa$ |
| IL-22                        | PerCP-eFluor710     | 22URTI       | eBiosciences   | Mouse IgG <sub>1</sub> , $\kappa$ |

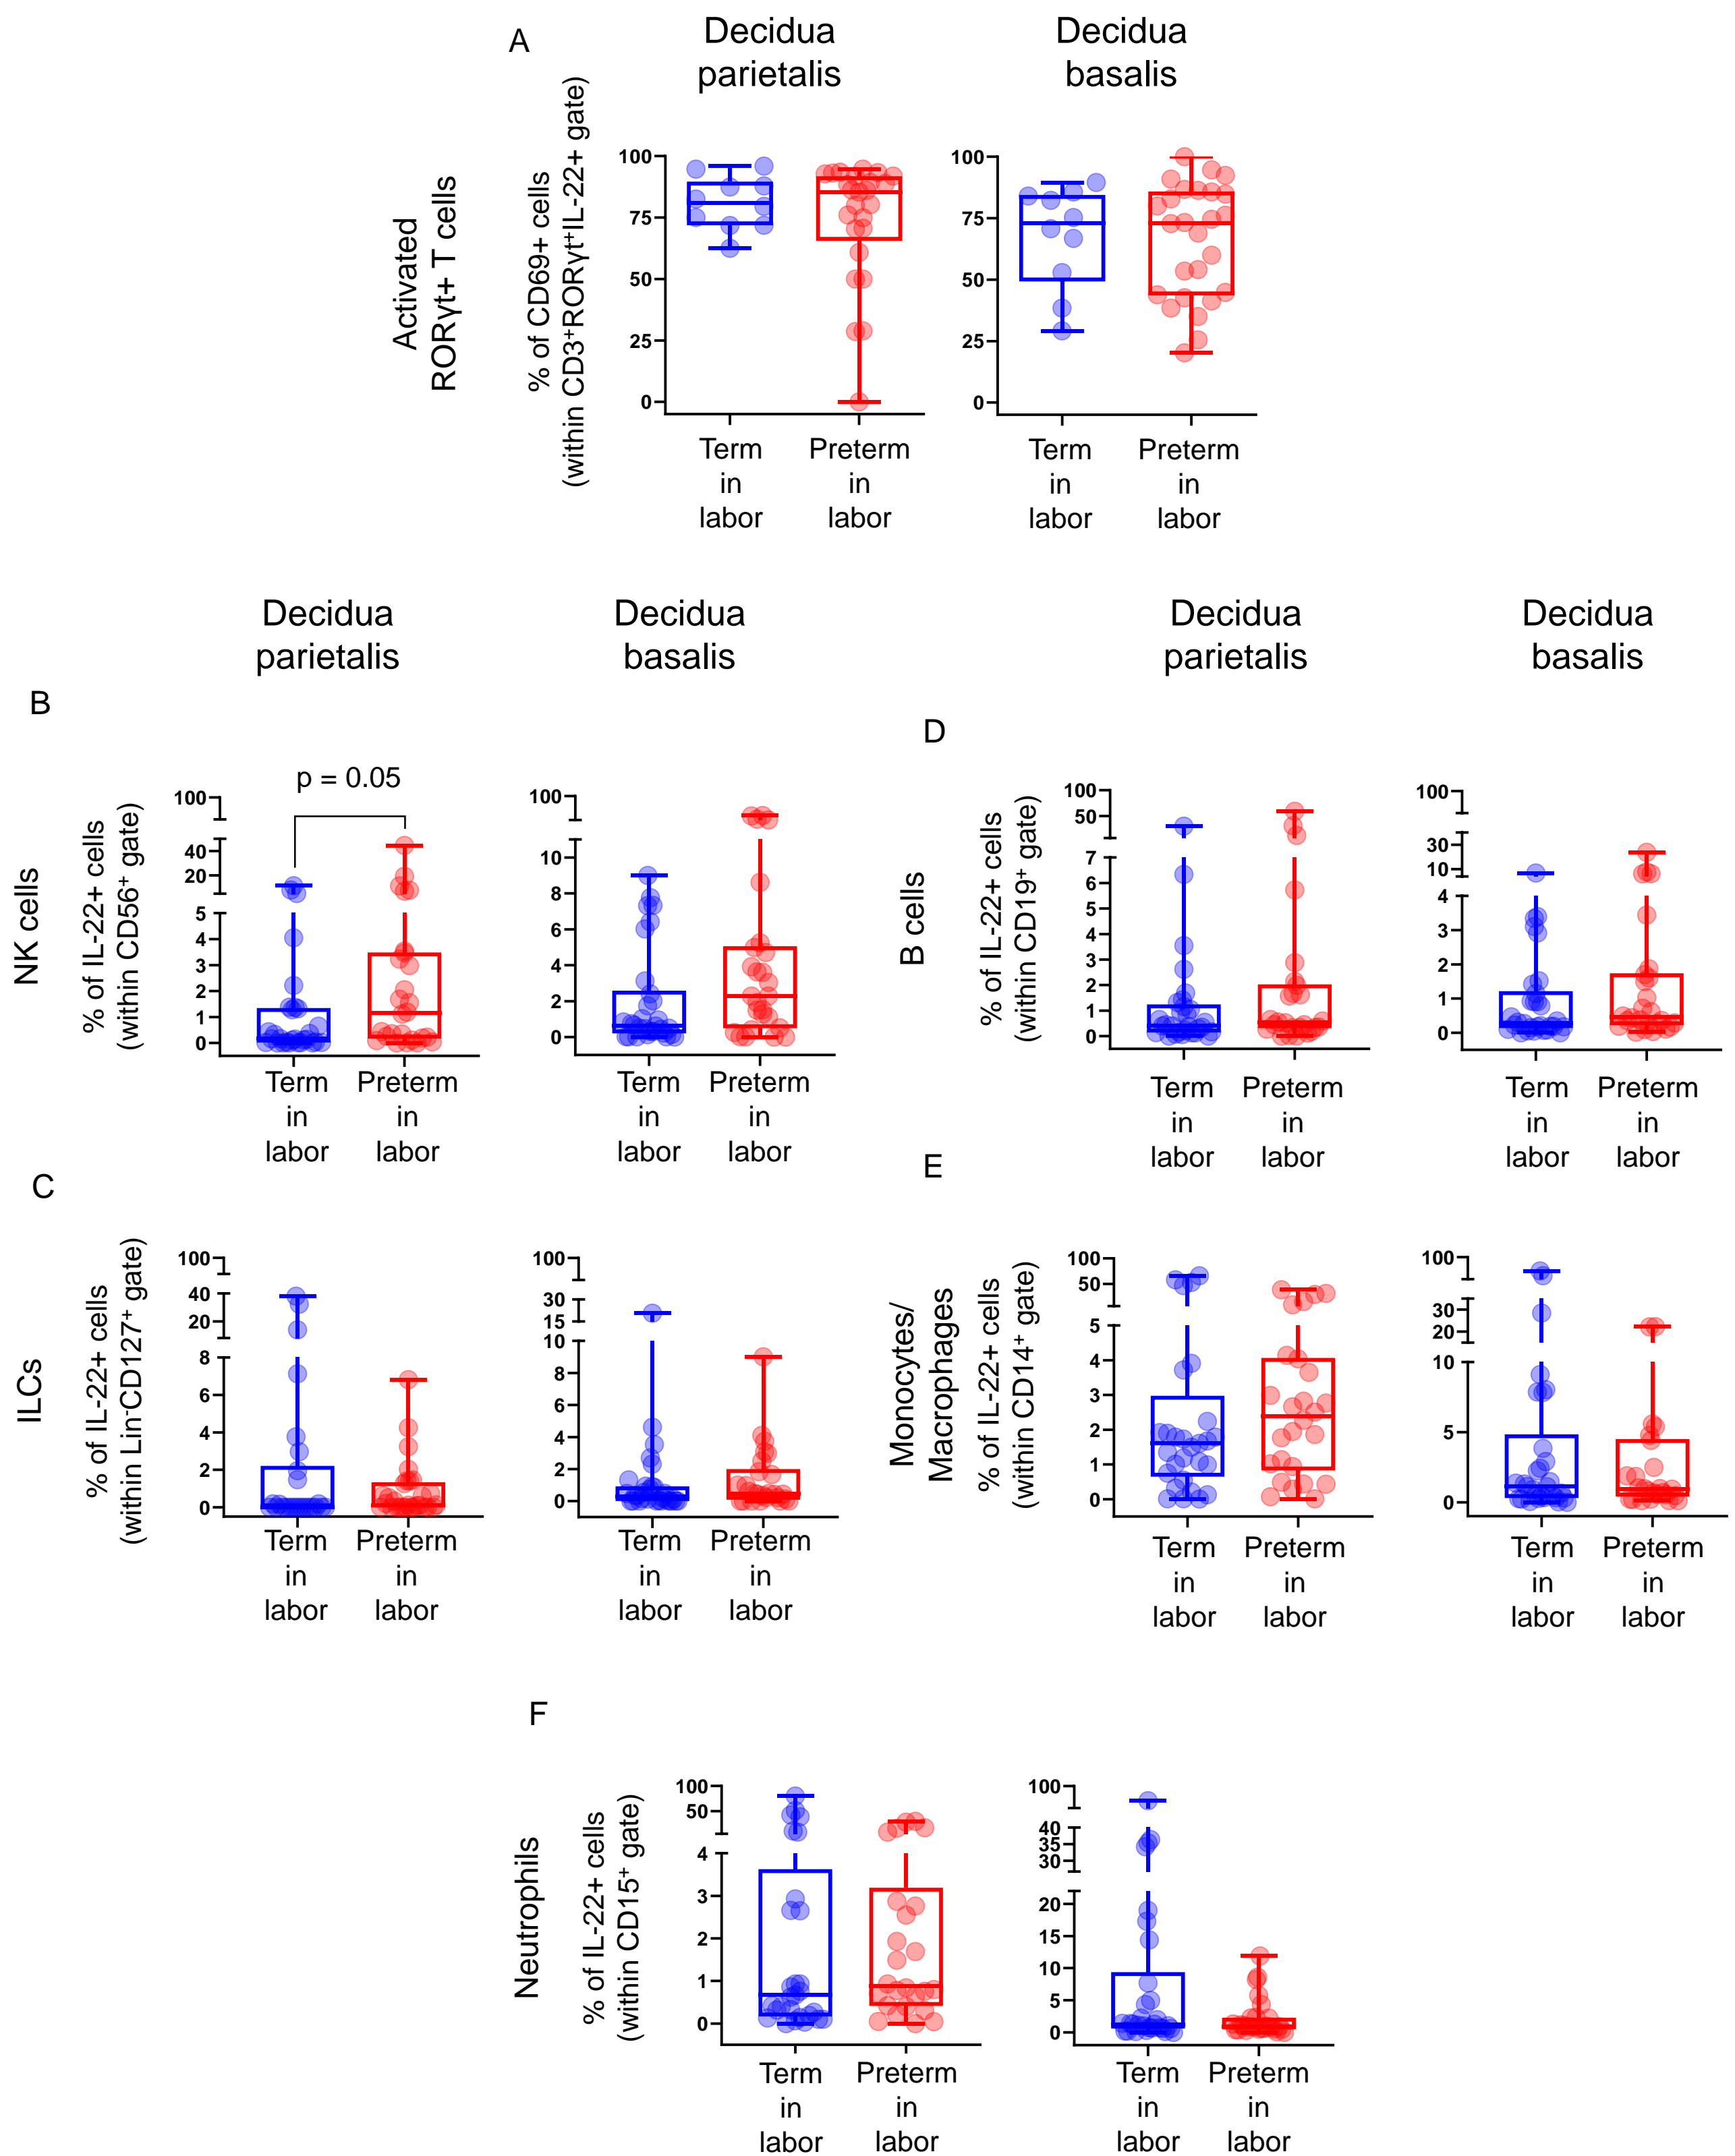

**Supplemental Figure 1.** Immunophenotyping of cellular sources of IL-22 in the human decidua of women with term or preterm labor. **(A)** Proportions of CD69<sup>+</sup>ROR $\gamma$ t<sup>+</sup> IL-22<sup>+</sup> T cells (CD14<sup>+</sup>CD15<sup>-</sup>CD19<sup>-</sup>CD3<sup>+</sup>) in the decidua parietalis of women with TIL (n = 29) or PTL (n = 26) and decidua basalis of women with TIL (n = 30) or PTL (n = 26). **(B)** Proportions of IL-22<sup>+</sup> NK cells (CD14<sup>+</sup>CD15<sup>-</sup>CD3<sup>-</sup>CD19<sup>-</sup>CD56<sup>+</sup>) in the decidua parietalis of women with TIL (n = 29) or PTL (n = 26) and decidua basalis of women with TIL (n = 30) or PTL (n = 26). **(C)** Proportions of IL-22<sup>+</sup> innate lymphoid cells (ILCs, CD14<sup>+</sup>CD15<sup>-</sup>CD3<sup>-</sup>CD19<sup>-</sup>CD11b<sup>-</sup>CD56<sup>-</sup>(Lin<sup>-</sup>)CD127<sup>+</sup>) in the decidua parietalis of women with TIL (n = 29) or PTL (n = 26) and decidua basalis of women with TIL (n = 30) or PTL (n = 26). **(D)** Proportions of IL-22<sup>+</sup> B cells (CD14<sup>+</sup>CD15<sup>-</sup>CD3<sup>-</sup>CD19<sup>+</sup>) in the decidua parietalis of women with TIL (n = 29) or PTL (n = 26) and decidua basalis of women with TIL (n = 30) or PTL (n = 26). **(E)** Proportions of IL-22<sup>+</sup> monocytes/macrophages (CD15<sup>-</sup>CD14<sup>+</sup>) in the decidua parietalis of women with TIL (n = 29) or PTL (n = 26) and decidua basalis of women with TIL (n = 30) or PTL (n = 26). **(F)** Proportions of IL-22<sup>+</sup> neutrophils (CD14<sup>+</sup>CD15<sup>+</sup>) in the decidua parietalis of women with TIL (n = 29) or PTL (n = 26) and decidua basalis of women with TIL (n = 30) or PTL (n = 26). P-values were determined by Mann-Whitney U-tests. Data are shown as scatter plots with medians, interquartile ranges, and min/max ranges. Demographic and clinical characteristics of the study population are shown in Table I.

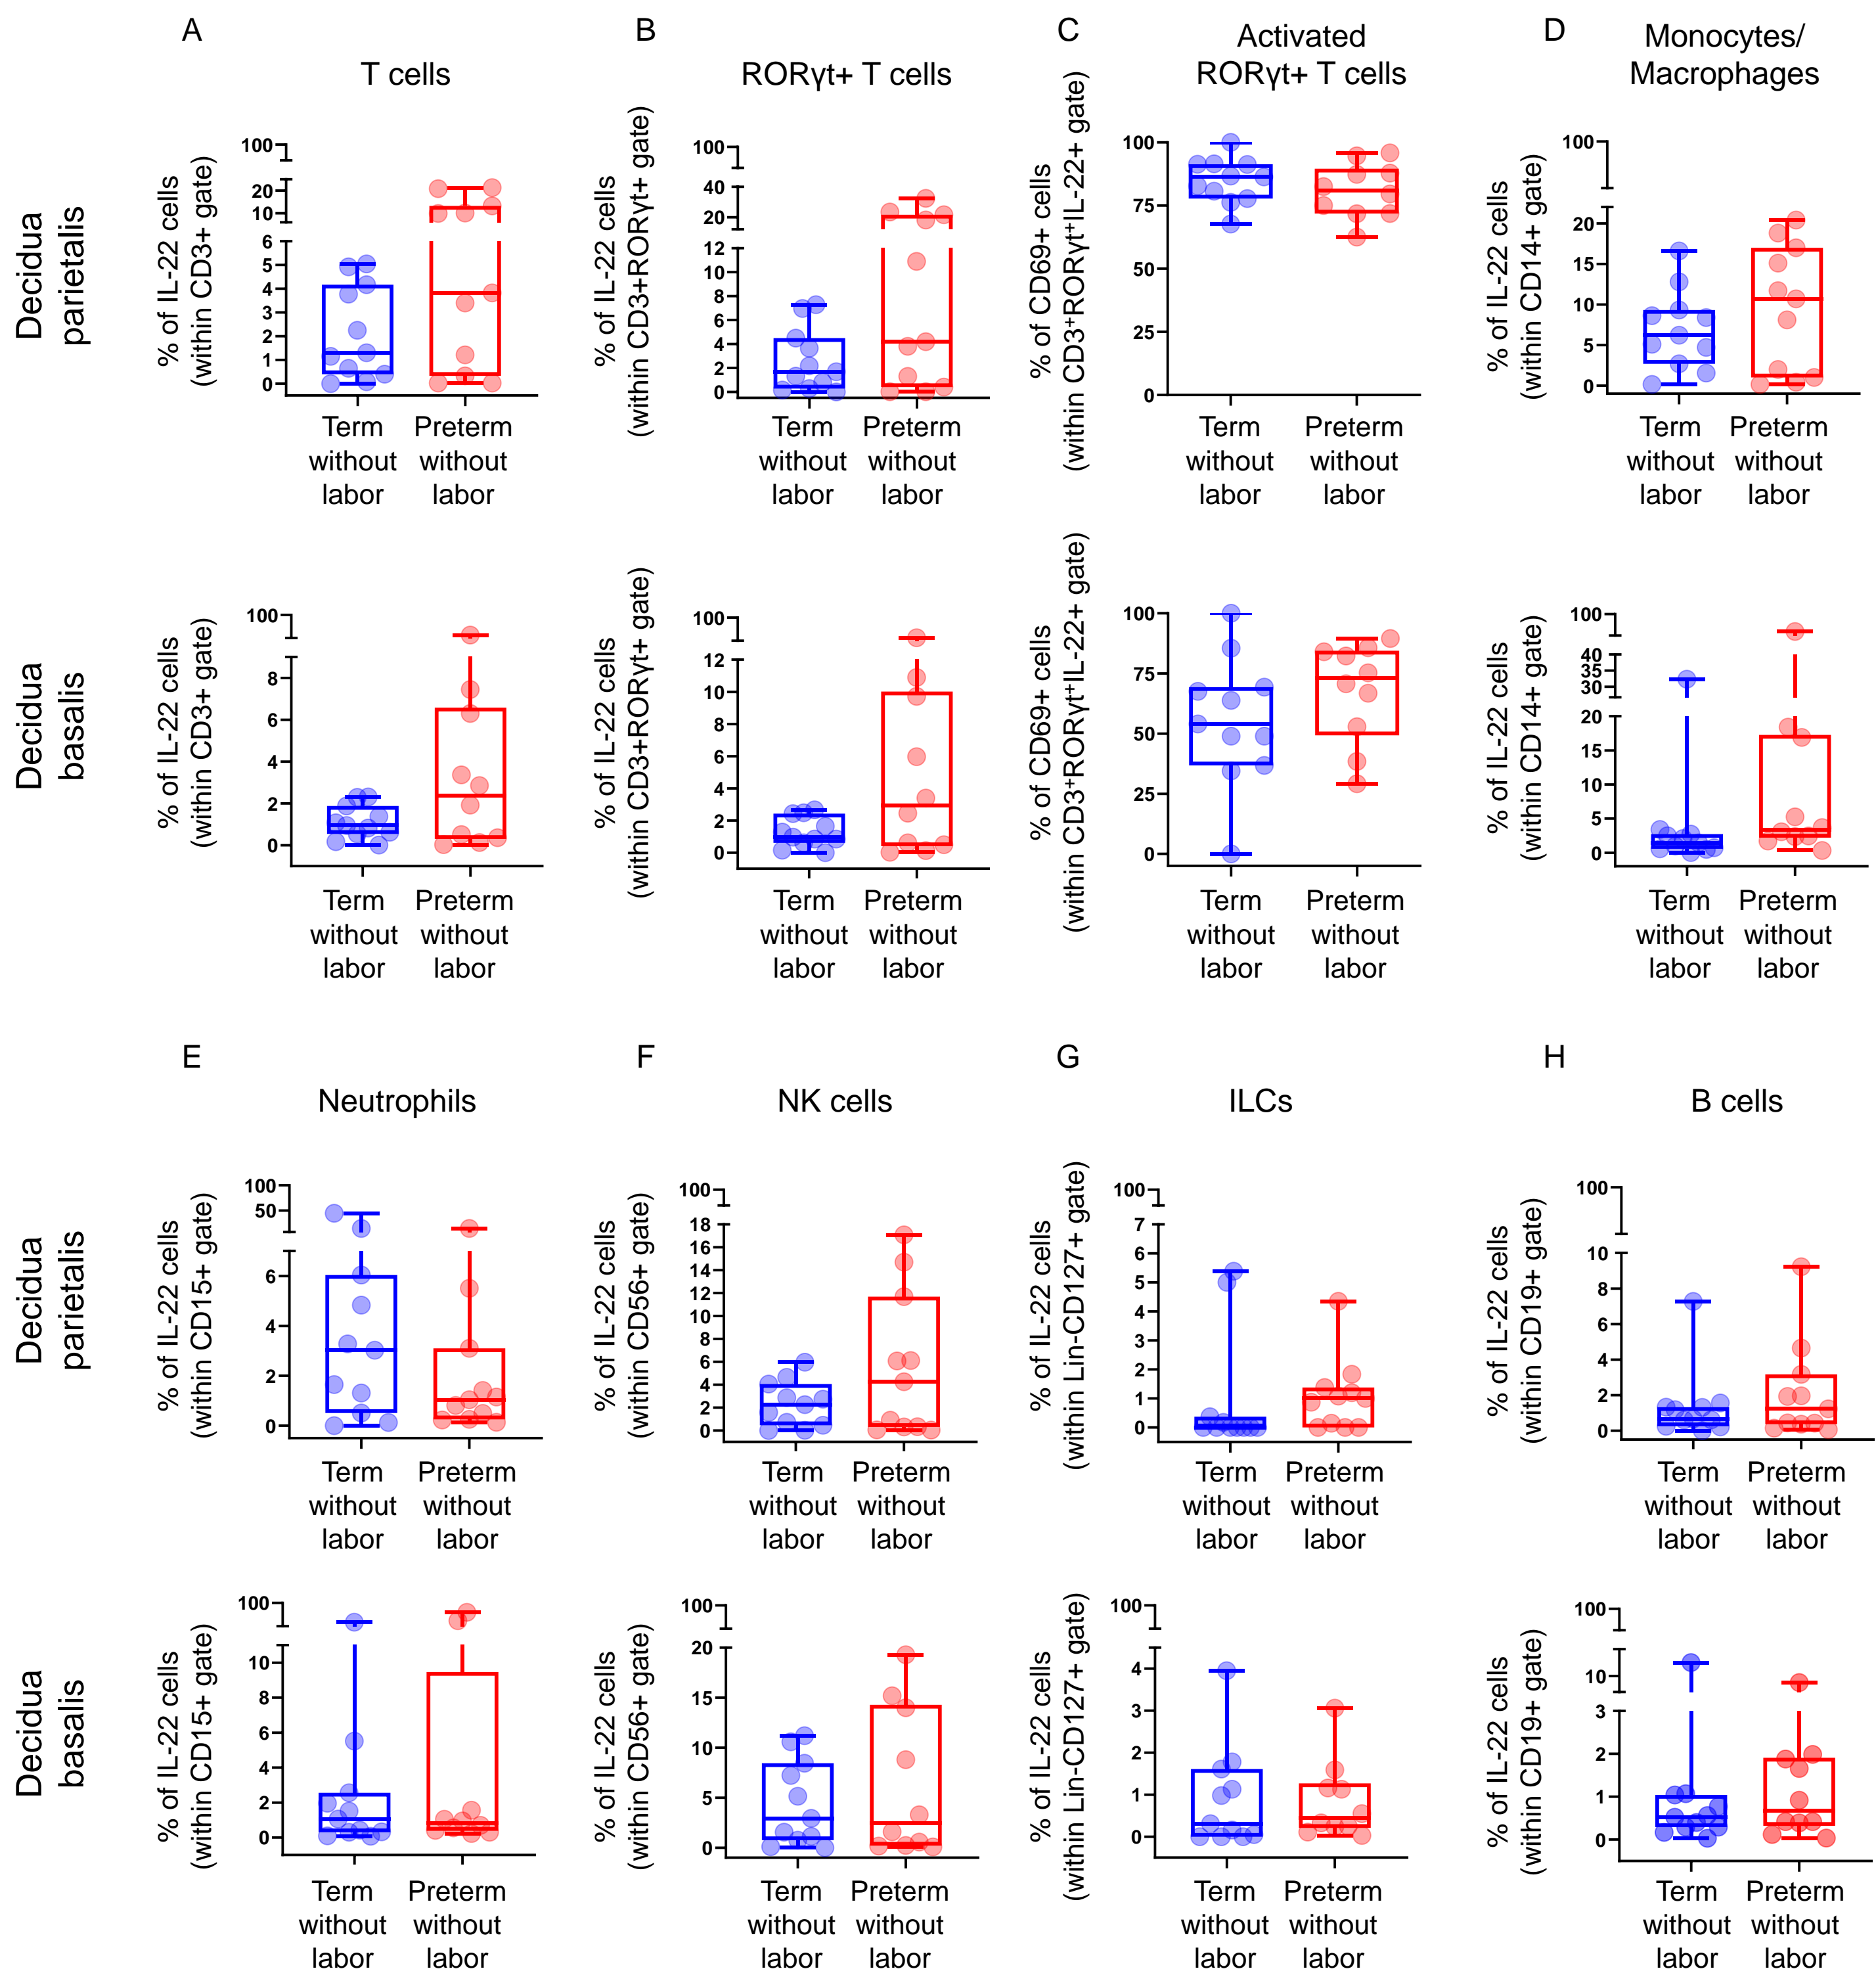

**Supplemental Figure 2.** Immunophenotyping of cellular sources of IL-22 in the human decidua of women who delivered term or preterm without labor. **(A)** Proportions of IL-22<sup>+</sup> T cells (CD14<sup>-</sup>CD15<sup>-</sup>CD19<sup>-</sup>CD3<sup>+</sup>) in the decidua parietalis of women who delivered at term without labor (TNL, n = 11) or preterm without labor (PTNL, n = 11) and decidua basalis of women with TNL (n = 11) or PTNL (n = 10). **(B)** Proportions of IL-22<sup>+</sup>RORγt<sup>+</sup> T cells (CD14<sup>-</sup>CD15<sup>-</sup>CD19<sup>-</sup>CD3<sup>+</sup>) in the decidua parietalis of women with TNL (n = 11) or PTNL (n = 11) and decidua basalis of women with TNL (n = 11) or PTNL (n = 10). **(C)** Proportions of CD69<sup>+</sup>IL-22<sup>+</sup>RORγt<sup>+</sup> T cells (CD14<sup>-</sup>CD15<sup>-</sup>CD19<sup>-</sup>CD3<sup>+</sup>) in the decidua parietalis of women with TNL (n = 11) or PTNL (n = 11) and decidua basalis of women with TNL (n = 11) or PTNL (n = 10). **(D)** Proportions of IL-22<sup>+</sup> monocytes/macrophages (CD15<sup>-</sup>CD14<sup>+</sup>) in the decidua parietalis of women with TNL (n = 11) or PTNL (n = 11) and decidua basalis of women with TNL (n = 11) or PTNL (n = 10). **(E)** Proportions of IL-22<sup>+</sup> neutrophils (CD14<sup>-</sup>CD15<sup>+</sup>) in the decidua parietalis of women with TNL (n = 11) or PTNL (n = 11) and decidua basalis of women with TNL (n = 11) or PTNL (n = 10). **(F)** Proportions of IL-22<sup>+</sup> NK cells (CD14<sup>-</sup>CD15<sup>-</sup>CD3<sup>-</sup>CD19<sup>-</sup>CD56<sup>+</sup>) in the decidua parietalis of women with TNL (n = 11) or PTNL (n = 11) and decidua basalis of women with TNL (n = 11) or PTNL (n = 10). **(G)** Proportions of IL-22<sup>+</sup> innate lymphoid cells (ILCs, CD14<sup>-</sup>CD15<sup>-</sup>CD3<sup>-</sup>CD19<sup>-</sup>CD11b<sup>-</sup>CD56<sup>-</sup>(Lin)<sup>-</sup>CD127<sup>+</sup>) in the decidua parietalis of women with TNL (n = 11) or PTNL (n = 11) and decidua basalis of women with TNL (n = 11) or PTNL (n = 10). **(H)** Proportions of IL-22<sup>+</sup> B cells (CD14<sup>-</sup>CD15<sup>-</sup>CD3<sup>-</sup>CD19<sup>+</sup>) in the decidua parietalis of women with TNL (n = 11) or PTNL (n = 11) and decidua basalis of women with TNL (n = 11) or PTNL (n = 10). The P-values were determined by Mann-Whitney U-tests. Data are shown as scatter plots with medians, interquartile ranges, and min/max ranges. Demographic and clinical characteristics of the study population are shown in Table I.

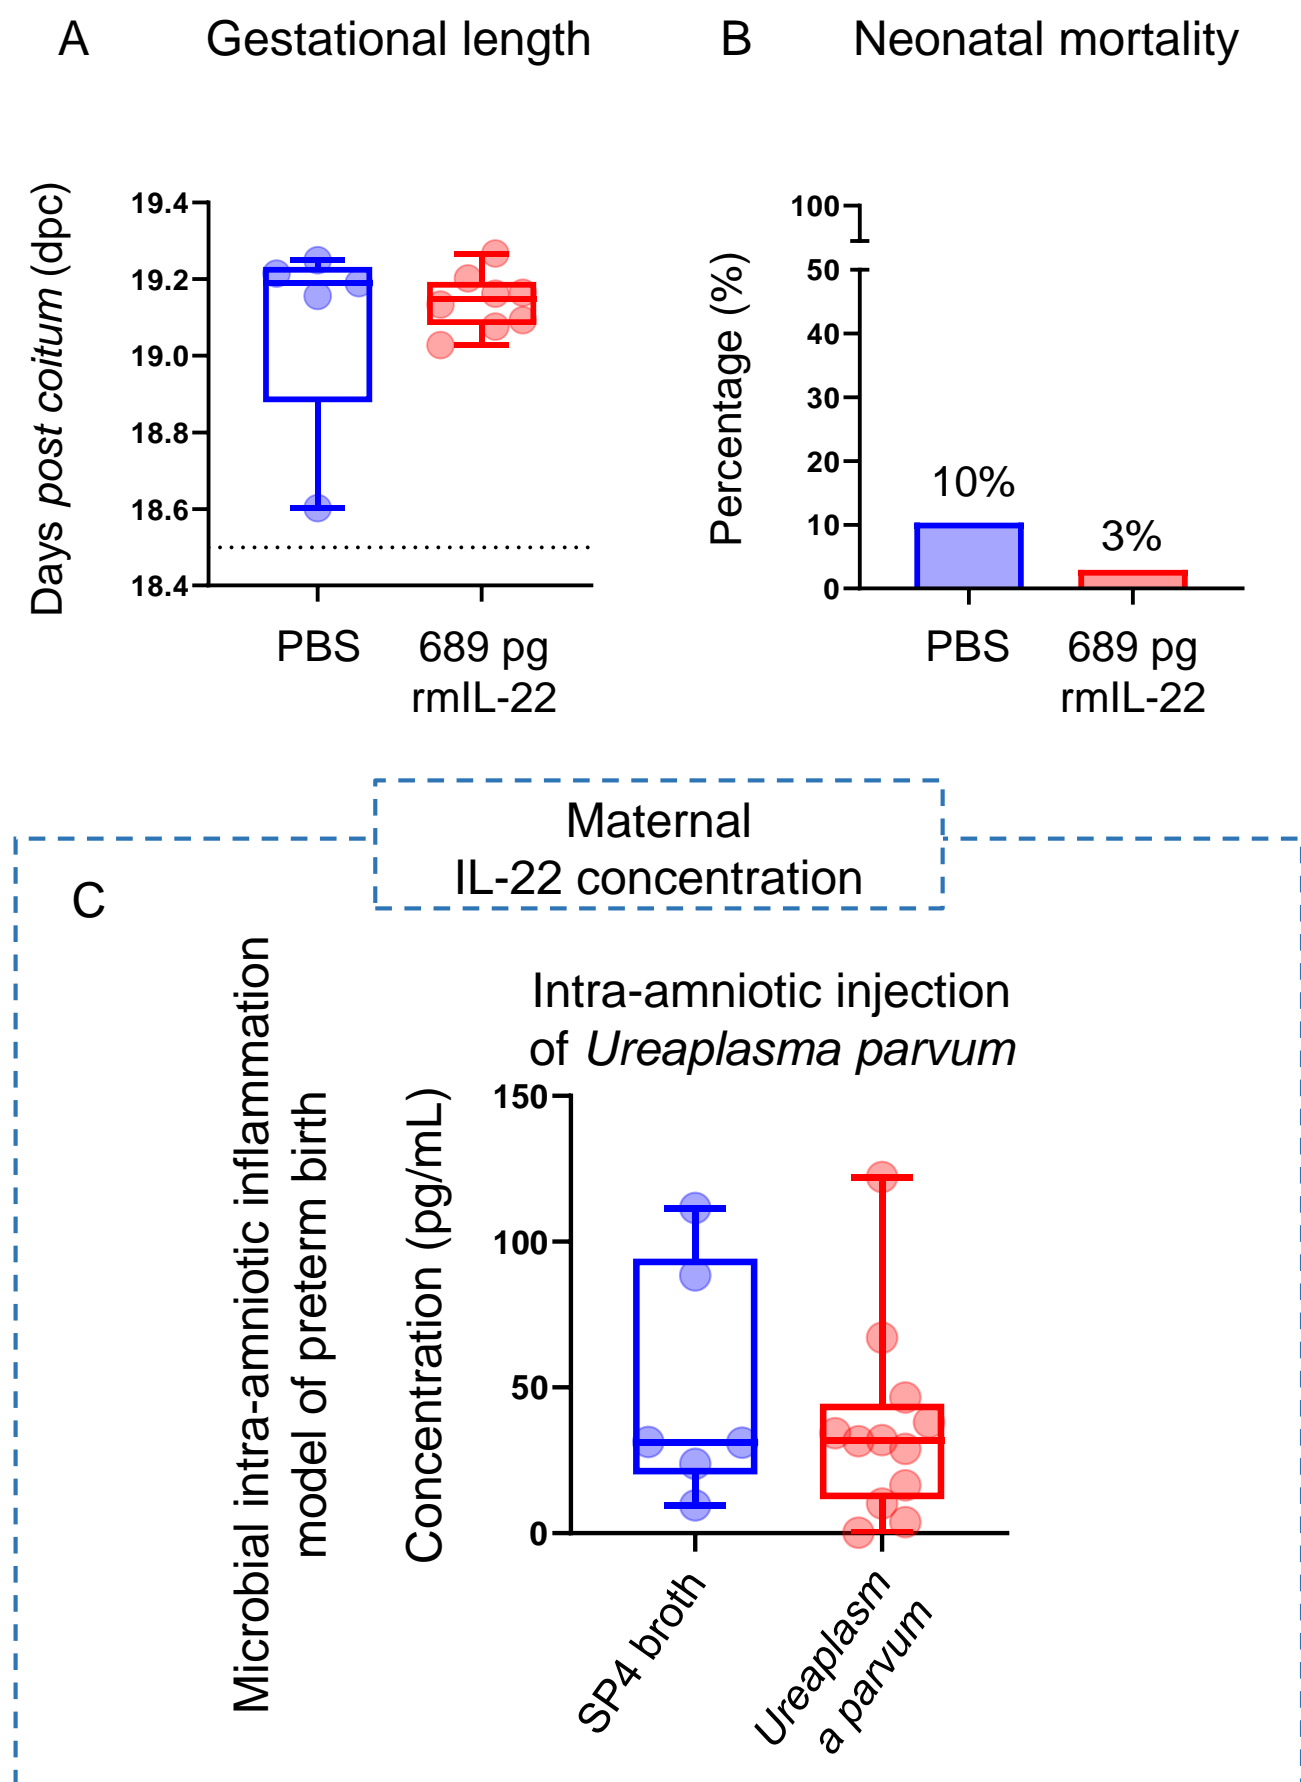

**Supplemental Figure 3.** Intravenous administration of IL-22 and maternal IL-22 concentrations prior to *Ureaplasma parvum*-induced preterm birth in mice. **(A)** Gestational length (dpc) of mice that received an intravenous injection of recombinant mouse IL-22 (rmIL-22) (red) (689 pg, n = 8) on 16.5 days *post coitum* or PBS (blue) as vehicle control (n = 5). Data are shown as scatter plots with medians, interquartile ranges, and min/max ranges. **(B)** Rate of mortality at birth of neonates born to mice that received an intravenous injection of rmIL-22 (red) or PBS (blue). Data are shown as means. **(C)** Concentrations of IL-22 in maternal serum of mice intra-amniotically injected with *Ureaplasma parvum* (n = 12) or SP4 broth (as vehicle control; n = 6) on 16.5 dpc. Data are shown as scatter plots with medians, interquartile ranges, and min/max ranges.
